# Supplementary material for: S100A9 Regulates MDSCs-Mediated Immune Suppression via the RAGE and TLR4 Signaling Pathways in Colorectal Carcinoma
Source: PubMed Central journal article supplement (PMC6759487; doi:10.3389/fimmu.2019.02243), 2019-09-18
Supplement: Image_1.pdf [file Image_1.pdf]

## Supplementary material

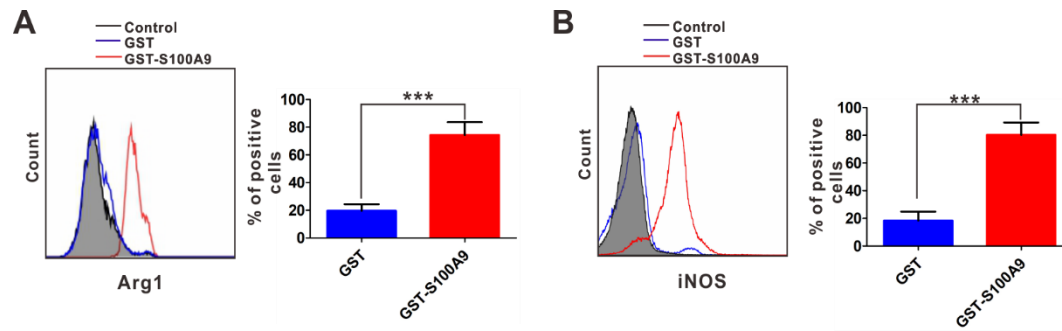

FIGURE S1 | Representative histograms for intracellular immunosuppressive molecules Arg1(A) and iNOS (B) expression in MDSCs by FCM analysis. The gray-filled histograms represent controls, and the different colored dotted lines represent MDSCs treated with GST-S100A9 (20 $\mu$ g/ml) and GST (20 $\mu$ g/ml) proteins. Statistical analysis of the mean percentages of Arg-1 (A) and iNOS (B) in positive cells in MDSC population. Data represents the mean $\pm$ SD. \*\*\*p<0.001.
